# Supplementary material for: Ce–Zr/SiO2: a versatile reusable heterogeneous catalyst for three-component synthesis and solvent free oxidation of benzyl alcohol
Source: Royal Society of Chemistry journal article supplement (doi:10.1039/c3ra47145d), 2013-12-24
Supplement: c3ra47145d.pdf [file c3ra47145d.pdf]

## Ce-Zr/SiO<sub>2</sub>: A versatile reusable heterogeneous catalyst for three-component synthesis of 2-amino-4*H*-pyranoquinoline derivatives

Ramakanth Pagadala, Suresh Maddila, Surjyakanta Rana, Sreekantha B. Jonnalagadda\*

*School of Chemistry & Physics, University of KwaZulu-Natal, Westville Campus, Chiltern Hills, Durban-4000, South Africa.*

\*Corresponding author Tel.: +27 31 260 7325/3090; fax: +27 31 260 3091;

E-Mail: [jonnalagaddas@ukzn.ac.za](mailto:jonnalagaddas@ukzn.ac.za)

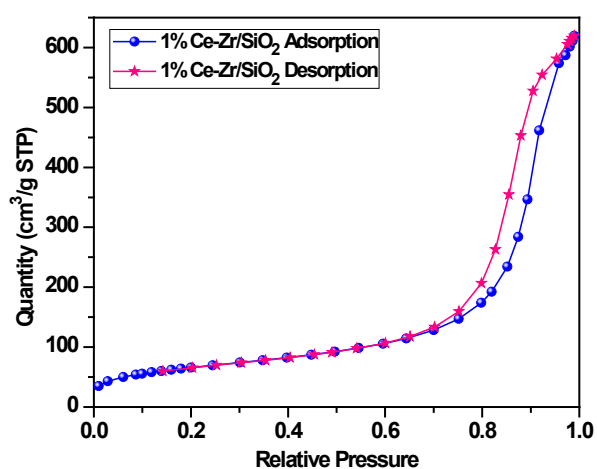

Fig 1. BET surface area and pore size of Ce-Zr/SiO<sub>2</sub>

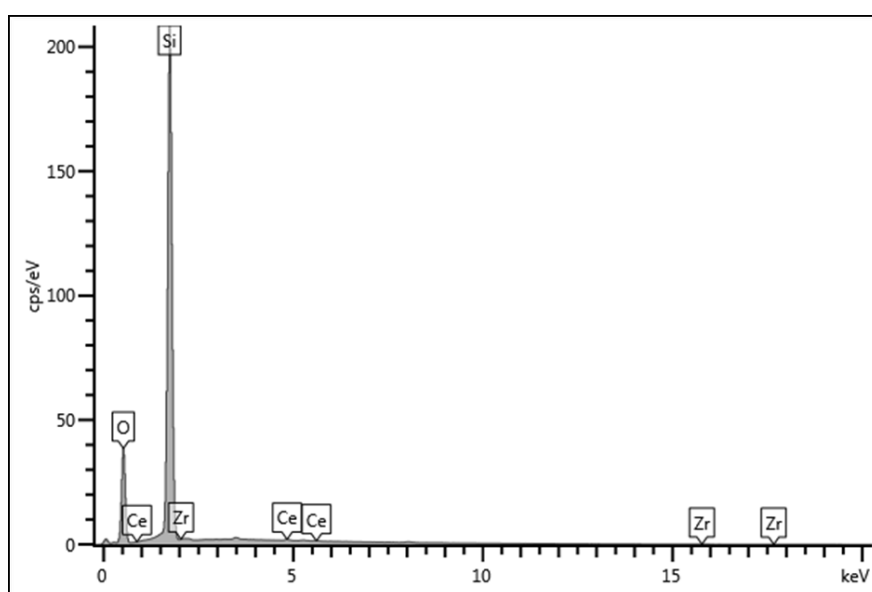

Fig 2. SEM-EDX of Ce-Zr/SiO<sub>2</sub>

## Apparatus and analysis

All chemicals used were reagent grade and were used as received without further purification.  $^1\text{H}$  NMR and  $^{13}\text{C}$  NMR spectra were recorded at 25 °C at 400 MHz and 100 MHz (Bruker Avance) instrument respectively, using TMS as internal standard. Chemical shifts are given in parts per million (ppm). The FT-IR spectroscopy of samples was carried out on a Perkin Elmer Precisely 100 FT-IR spectrometer in the 400-4000  $\text{cm}^{-1}$  region. LCMS mass spectra were recorded on a MASPEC low resolution mass spectrometer operating at 70 eV. Elemental analyses were carried out using a Perkin-Elmer CHNS Elemental Analyzer model 2400. Reactions were monitored and the purity of products was checked out on thin layer chromatography (TLC) on aluminium-backed plates coated with Merck Kieselgel 60 F254 silica gel, visualizing the spots under ultraviolet light and iodine chamber. Melting points are uncorrected and were recorded on a hot stage melting point apparatus Ernst Leitz Wetzlar, Germany.

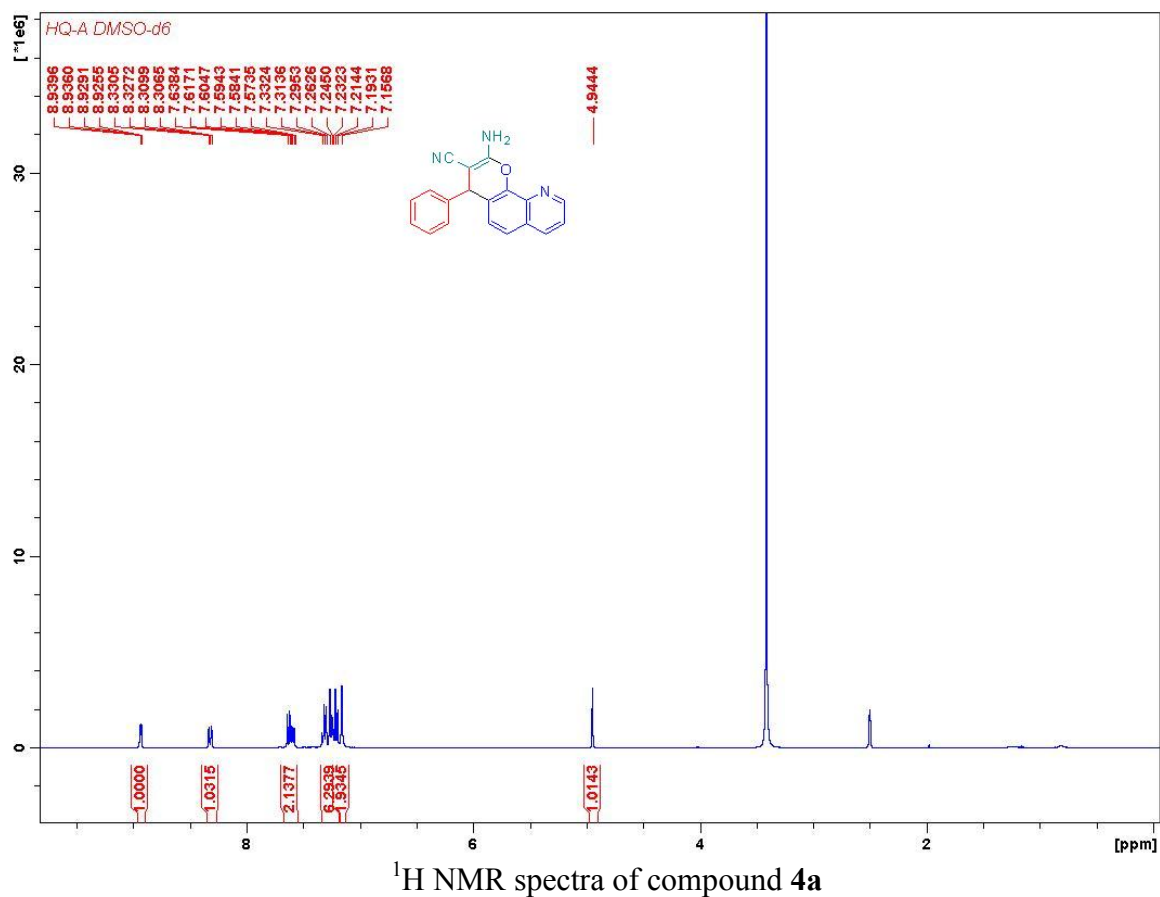

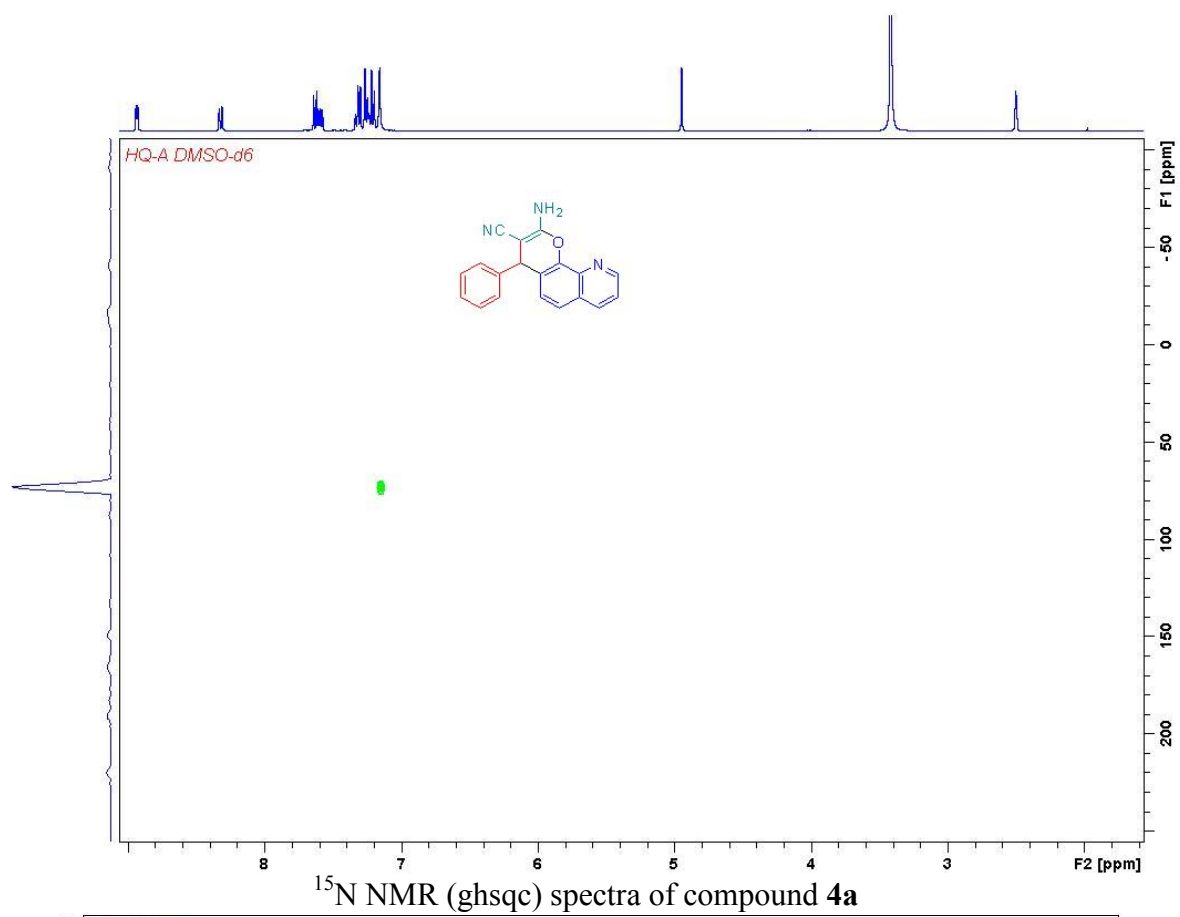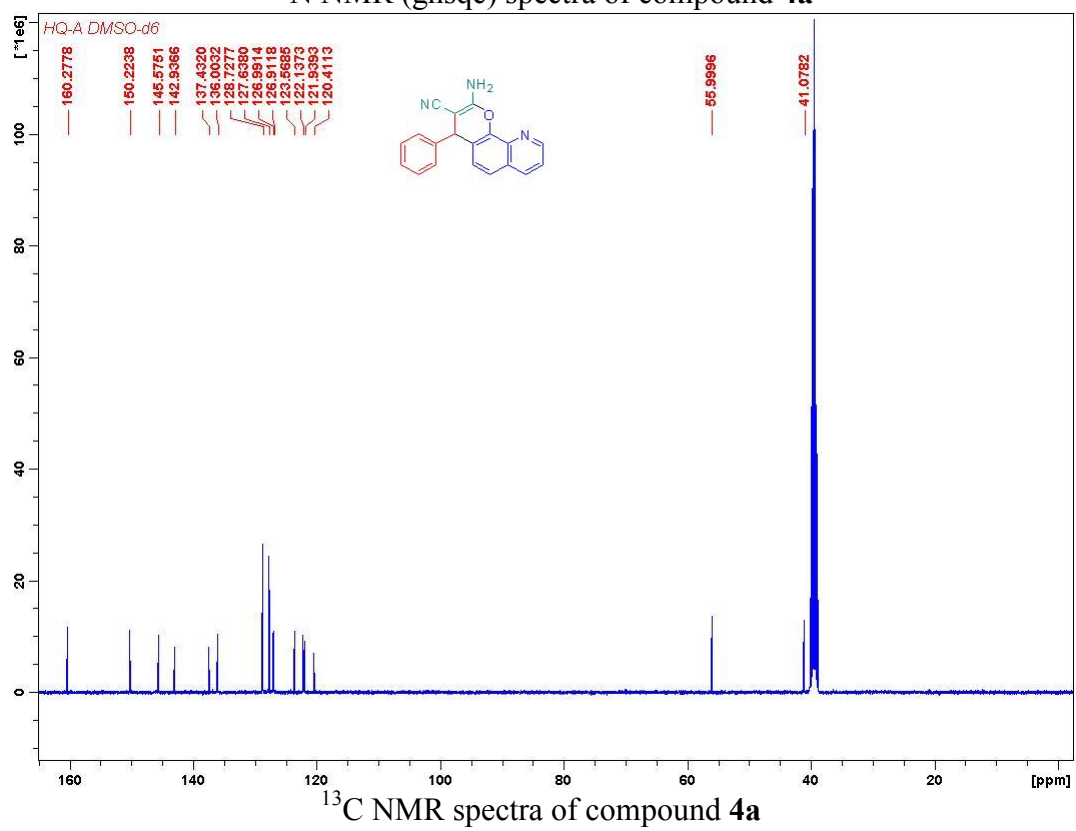

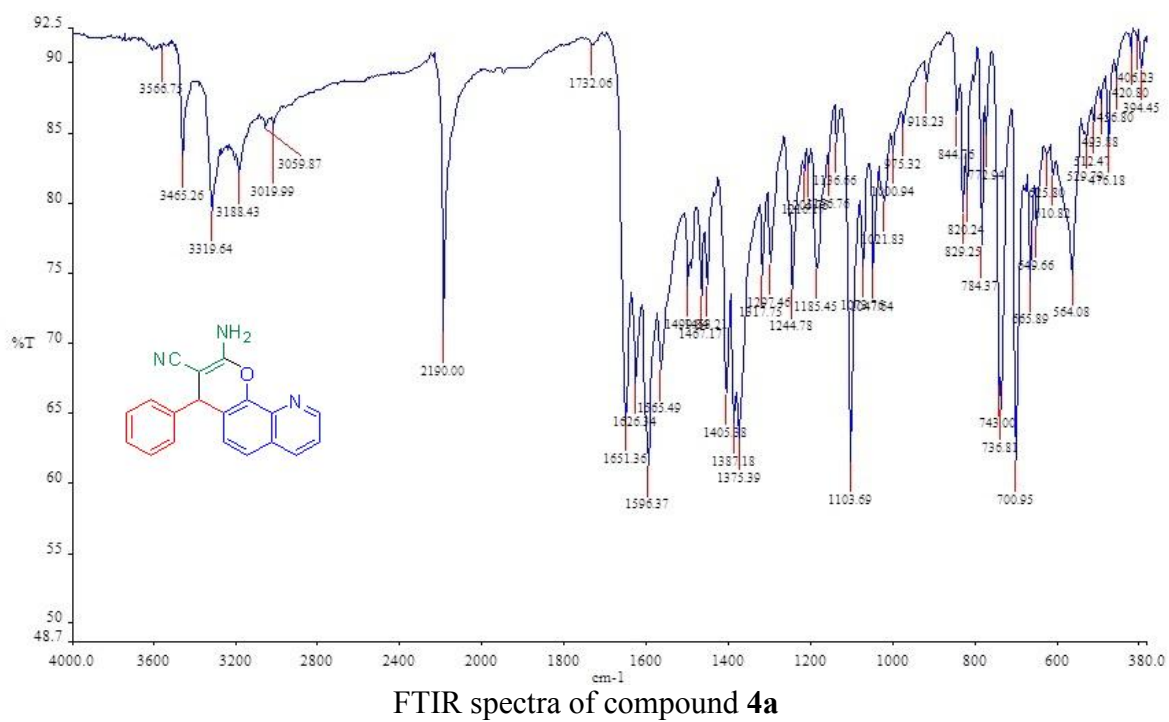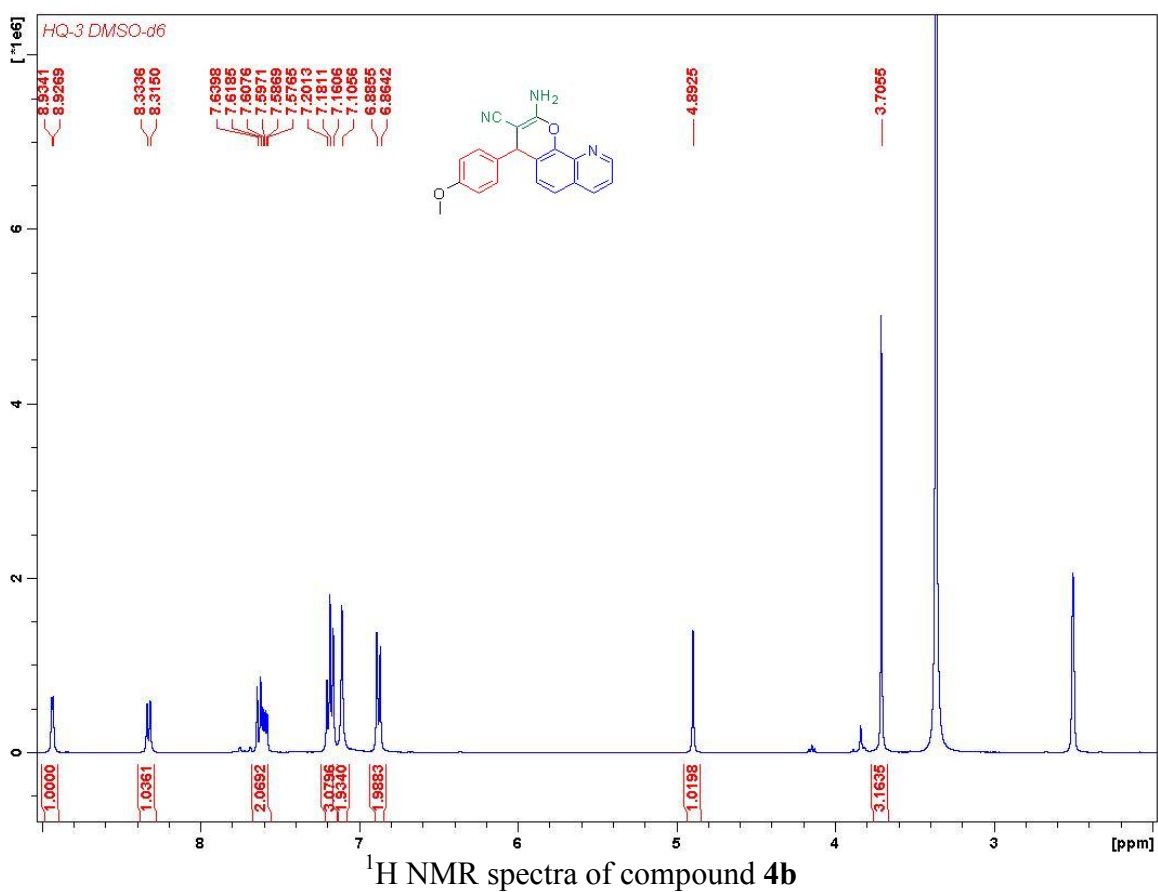

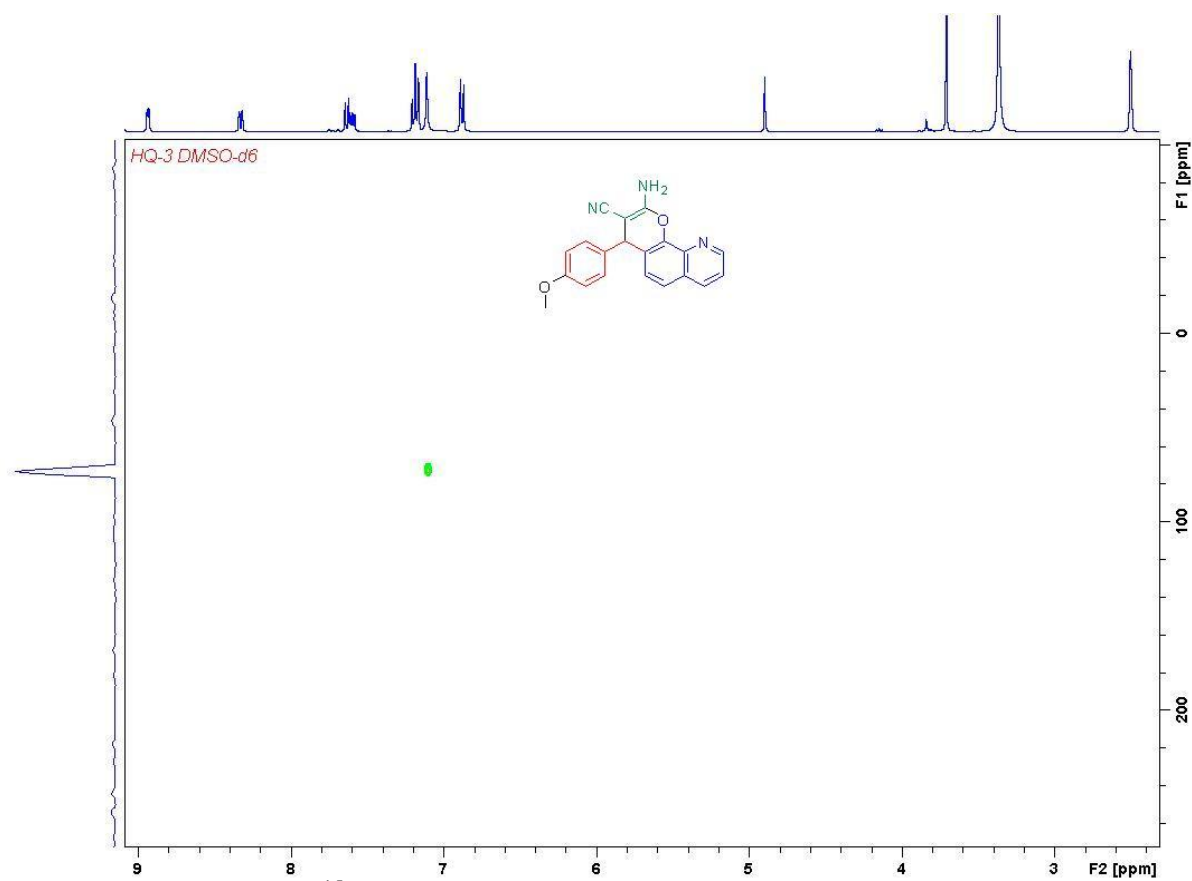

<sup>15</sup>N NMR (ghsqc) spectra of compound **4b**

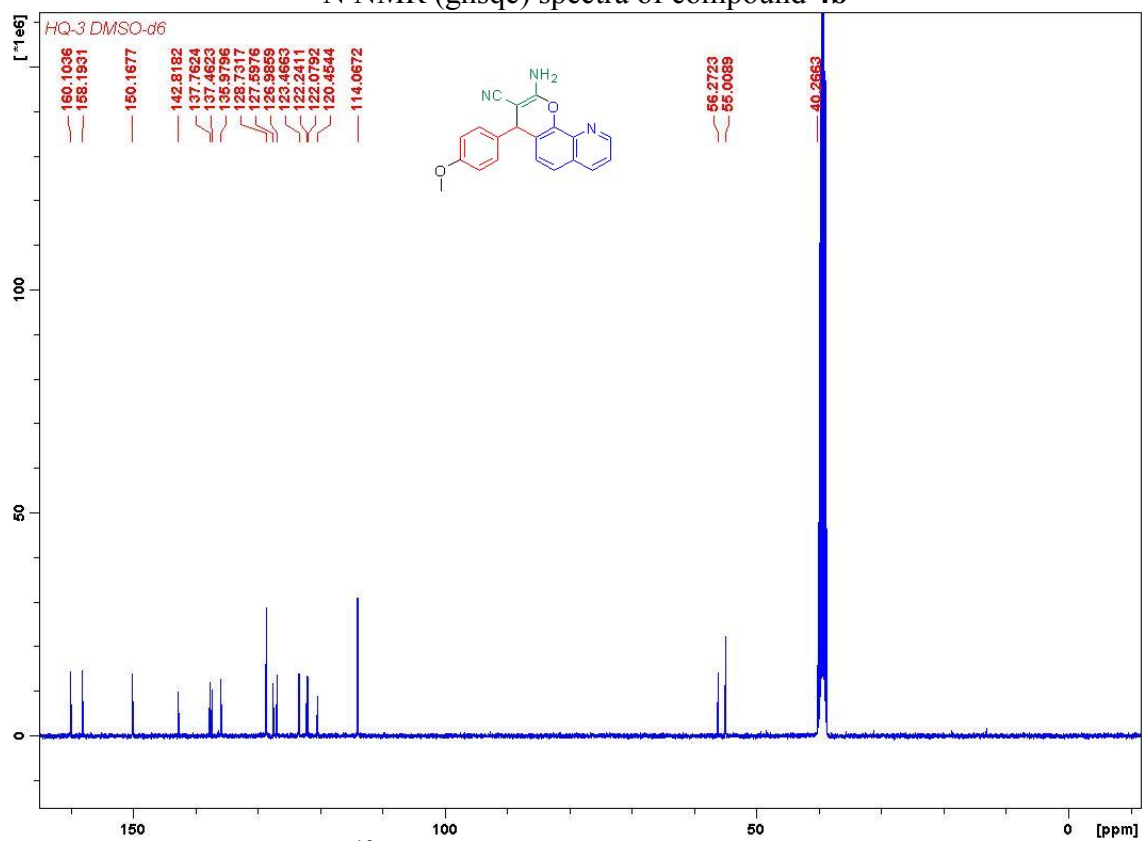

<sup>13</sup>C NMR spectra of compound **4b**

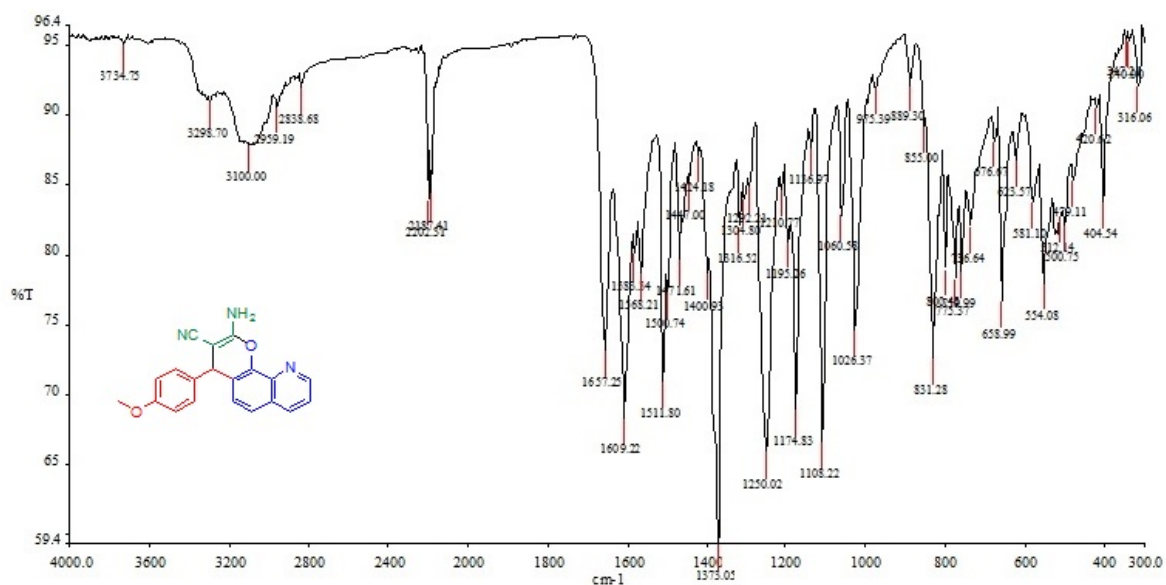

FTIR spectra of compound **4b**

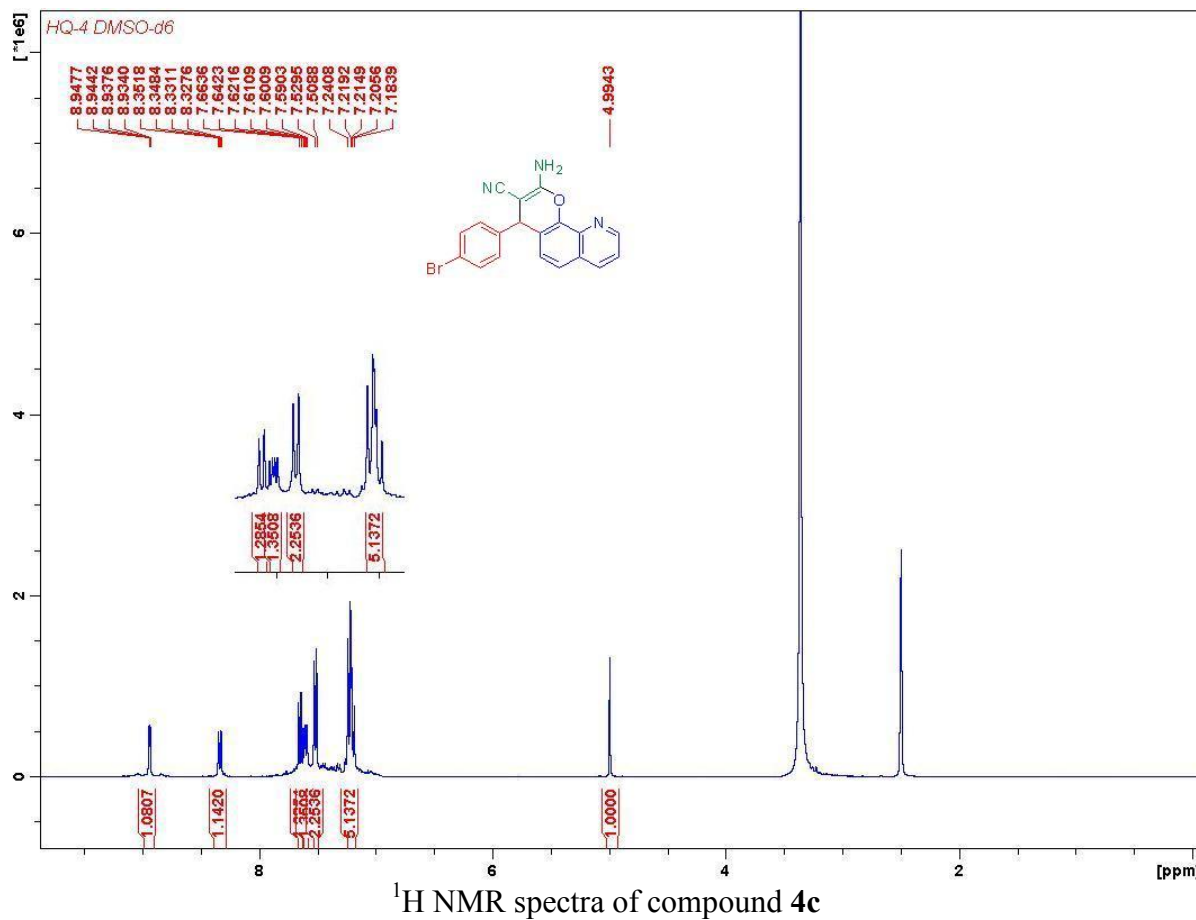

$^1\text{H}$  NMR spectra of compound **4c**

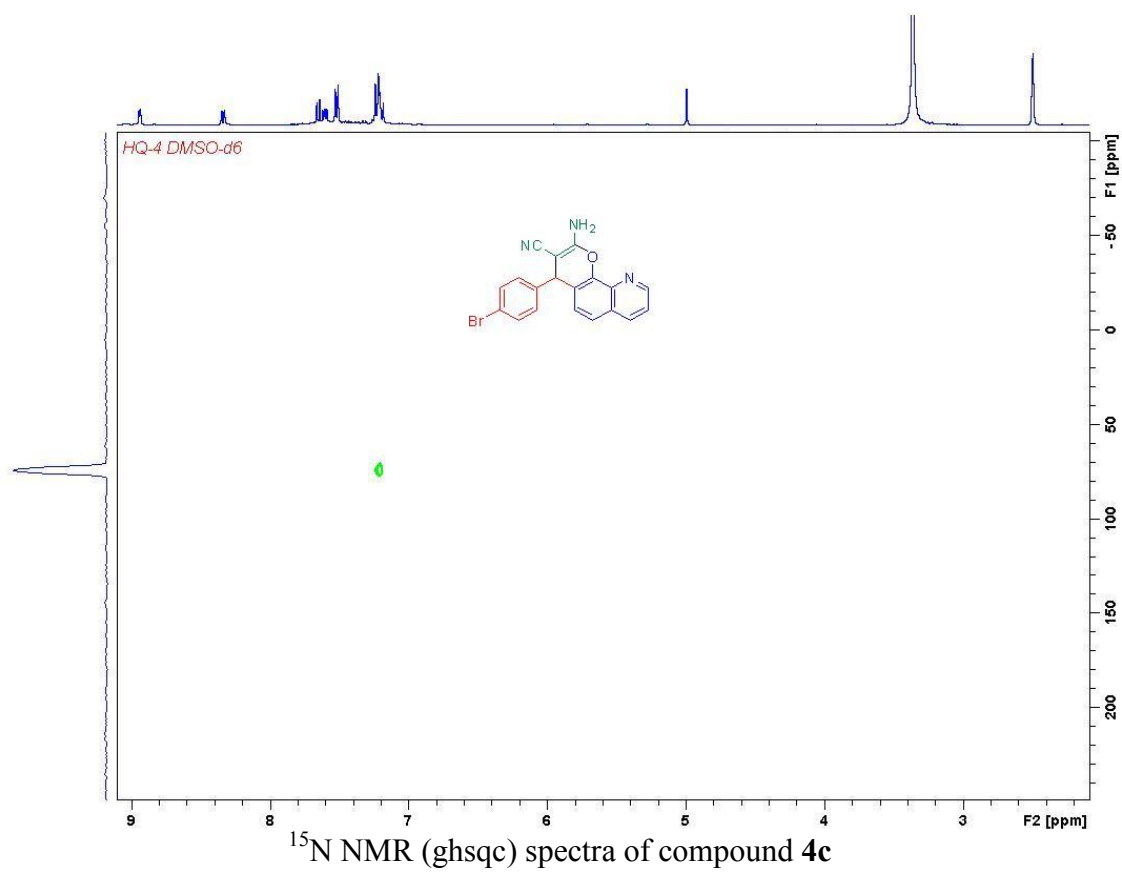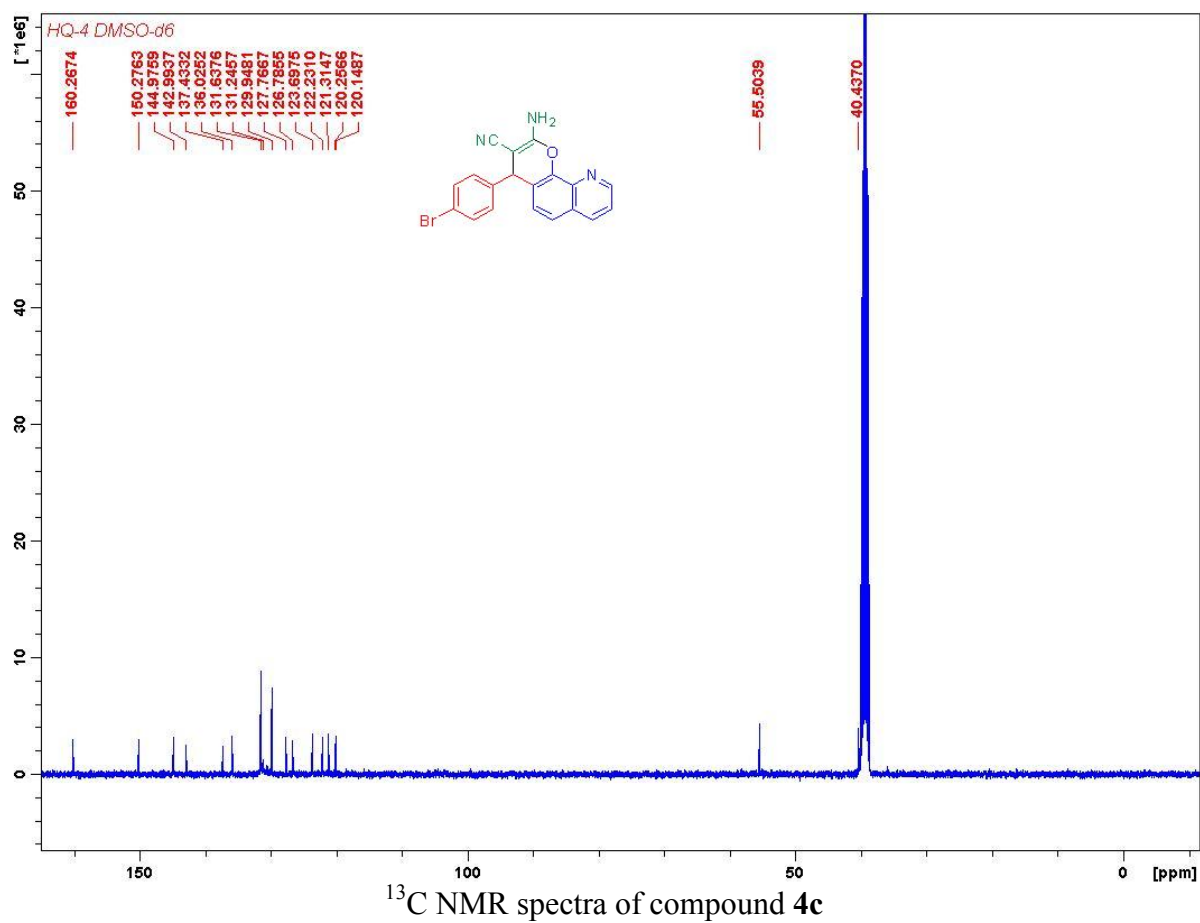

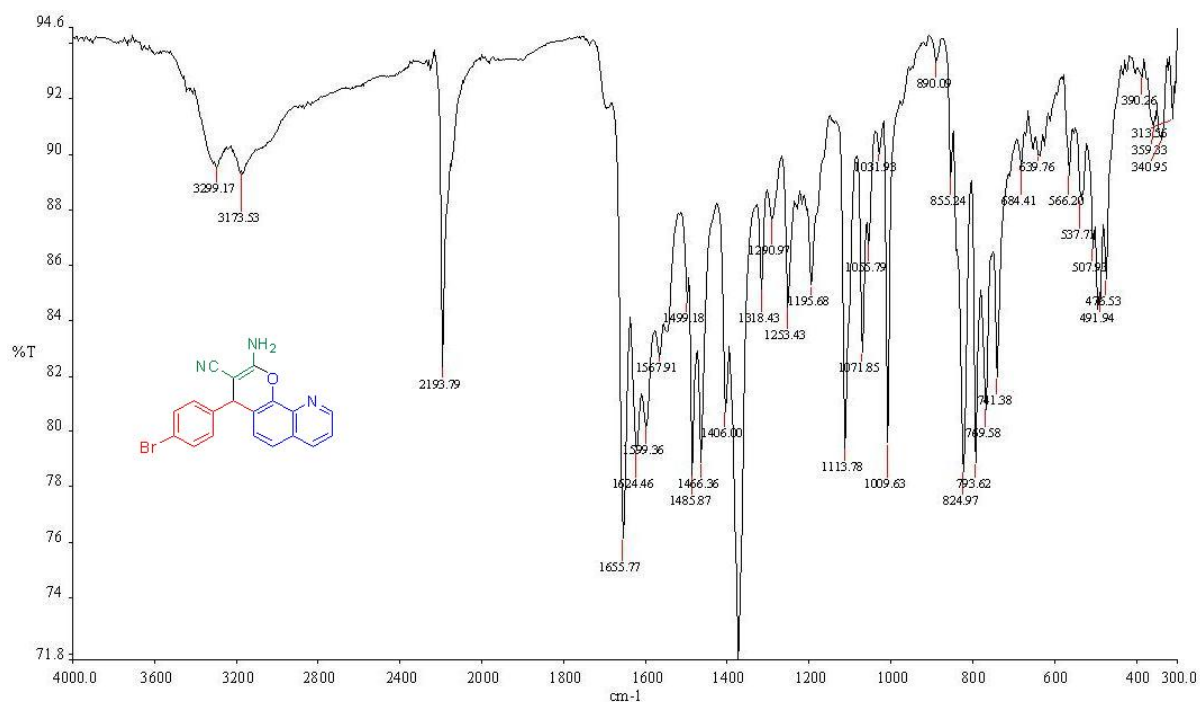

FTIR spectra of compound **4c**

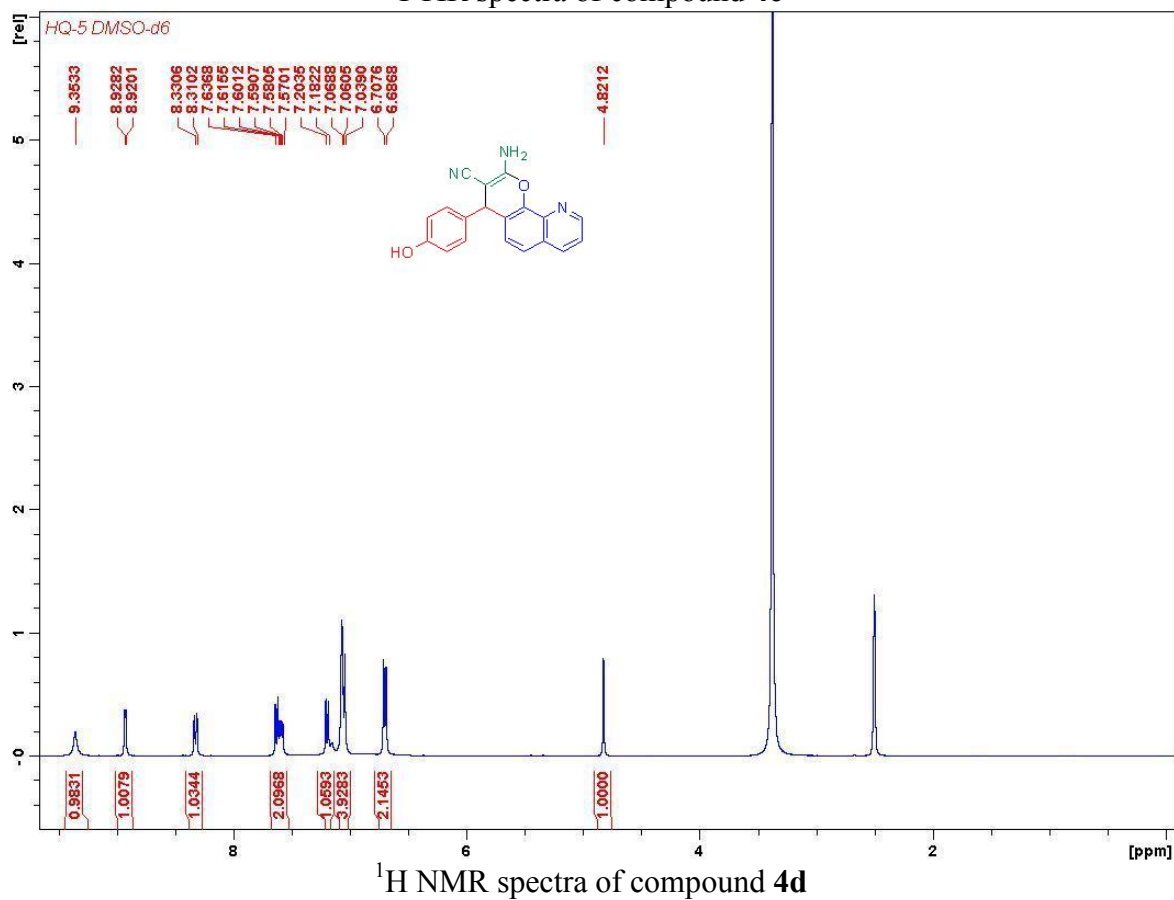

<sup>1</sup>H NMR spectra of compound **4d**



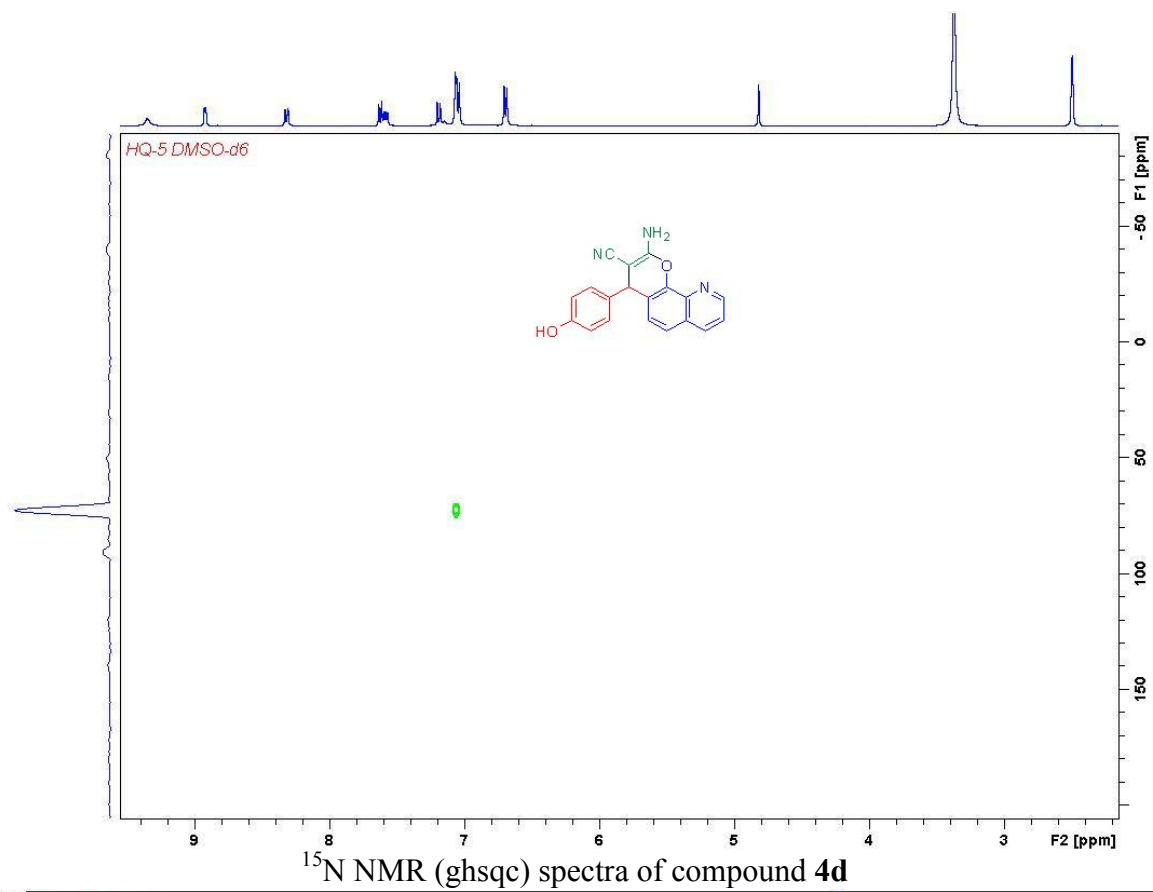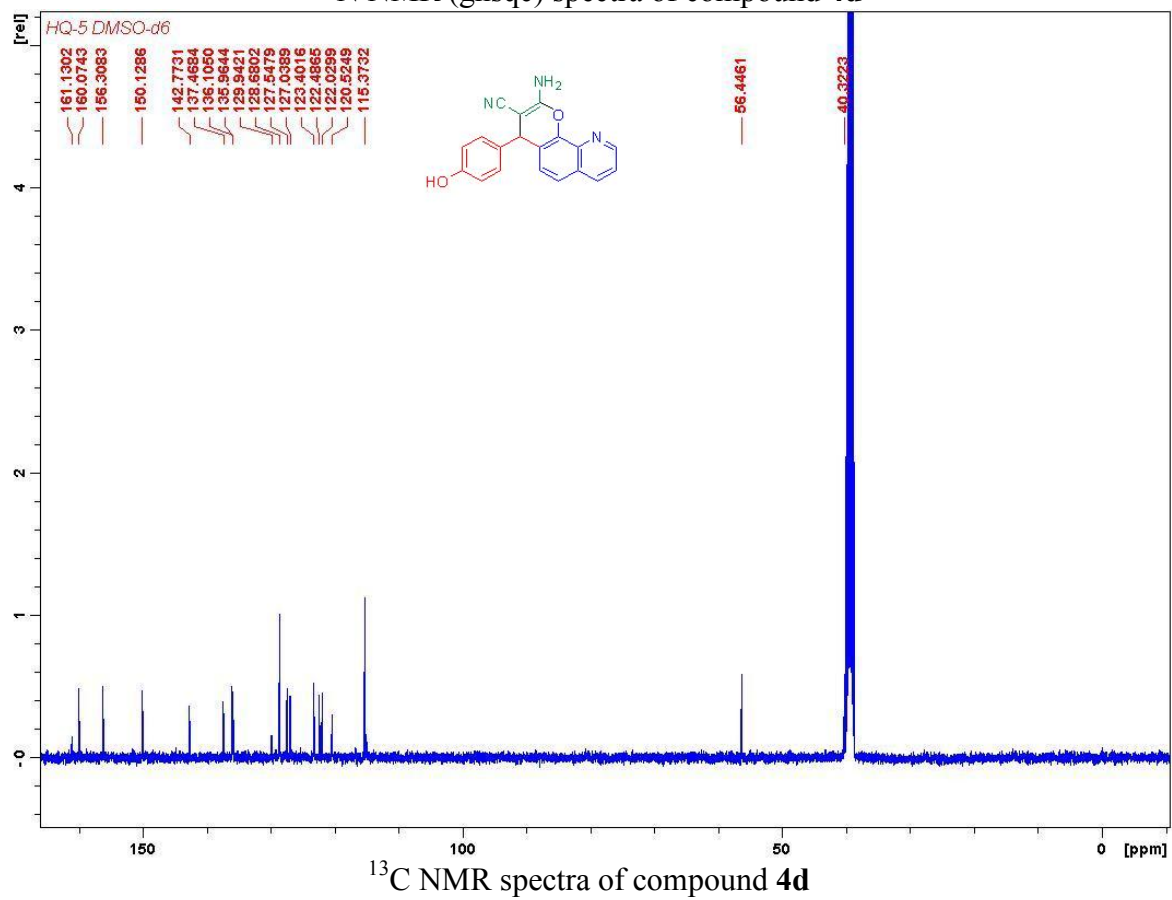

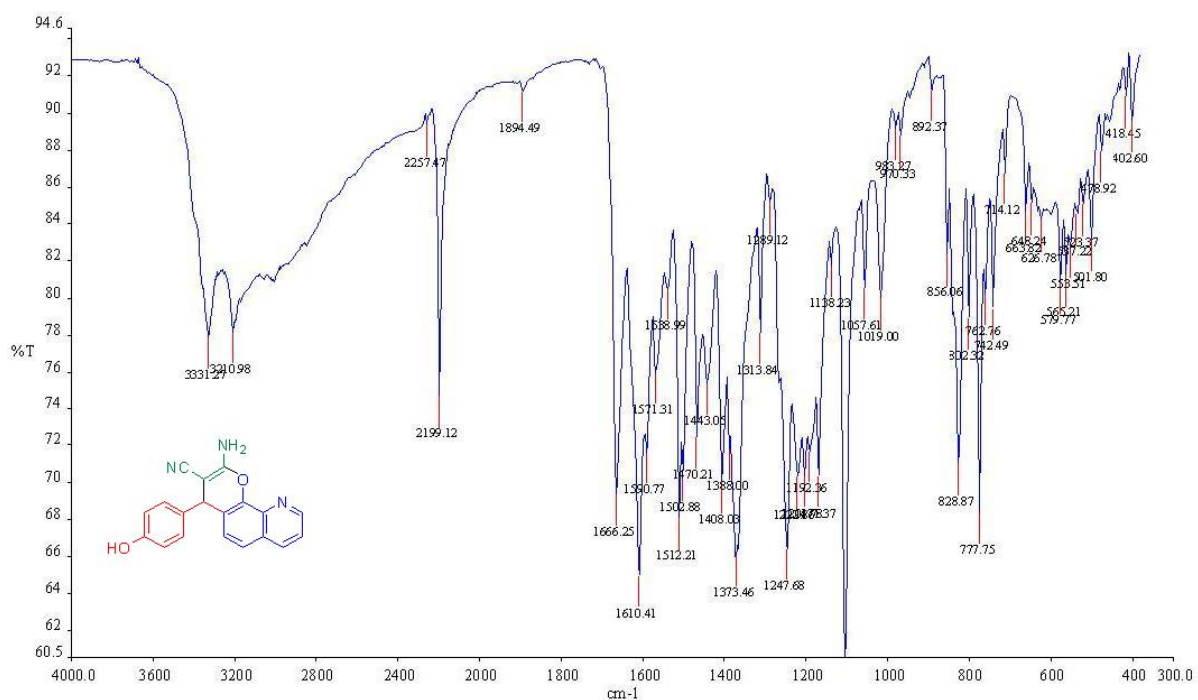

FTIR spectra of compound 4d

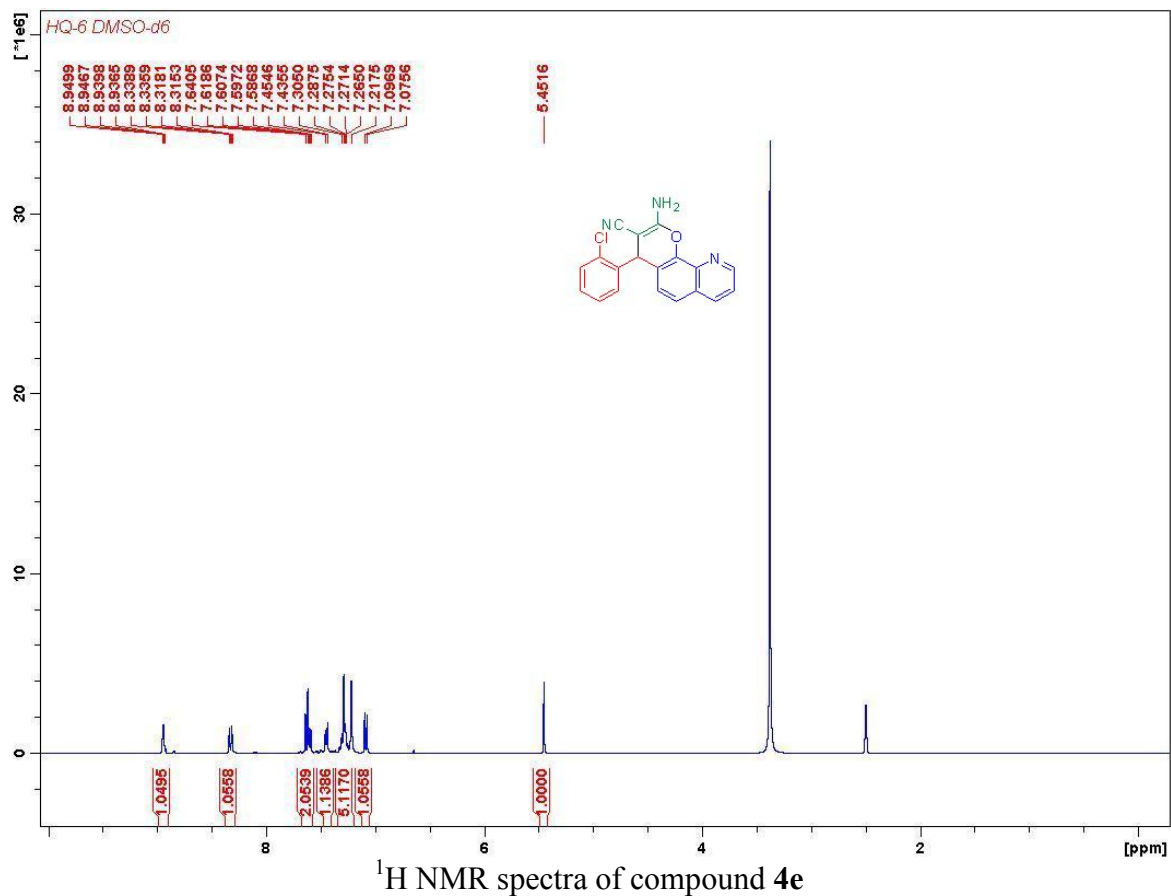

<sup>1</sup>H NMR spectra of compound 4e

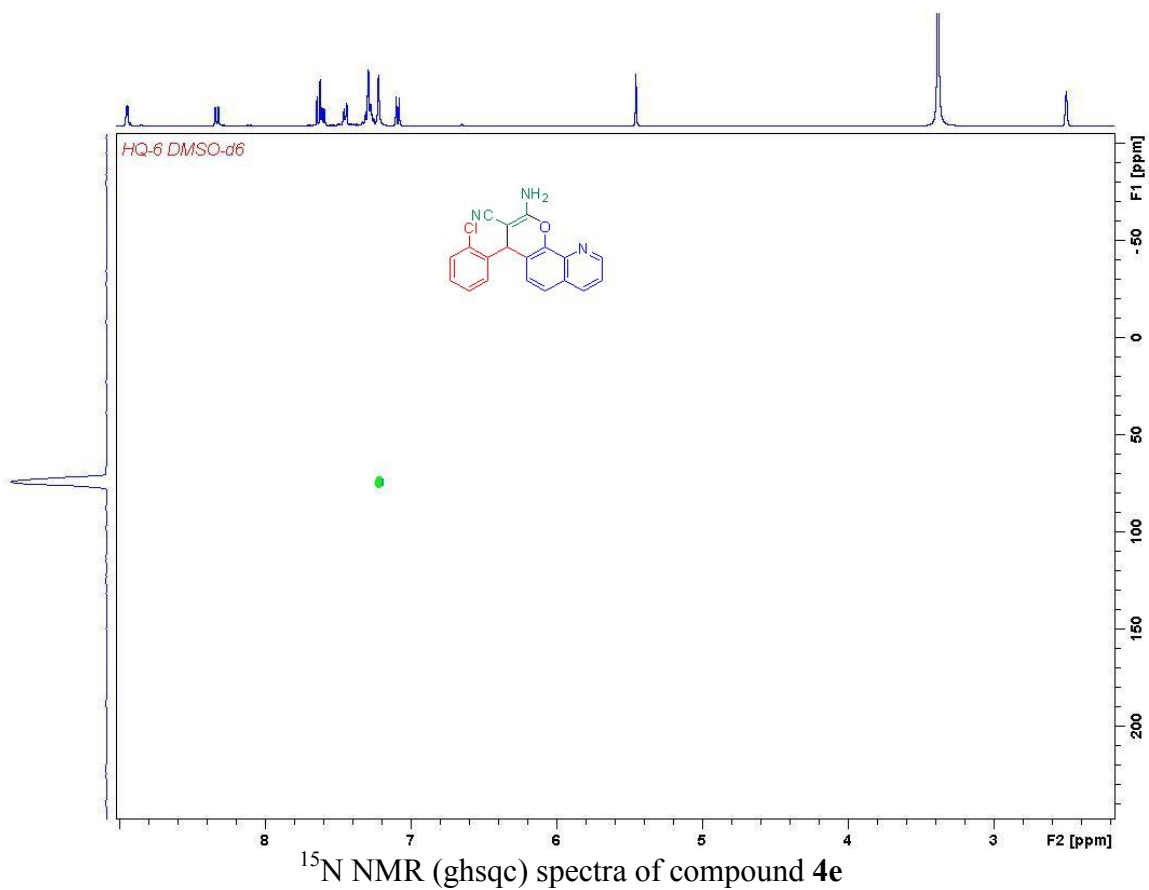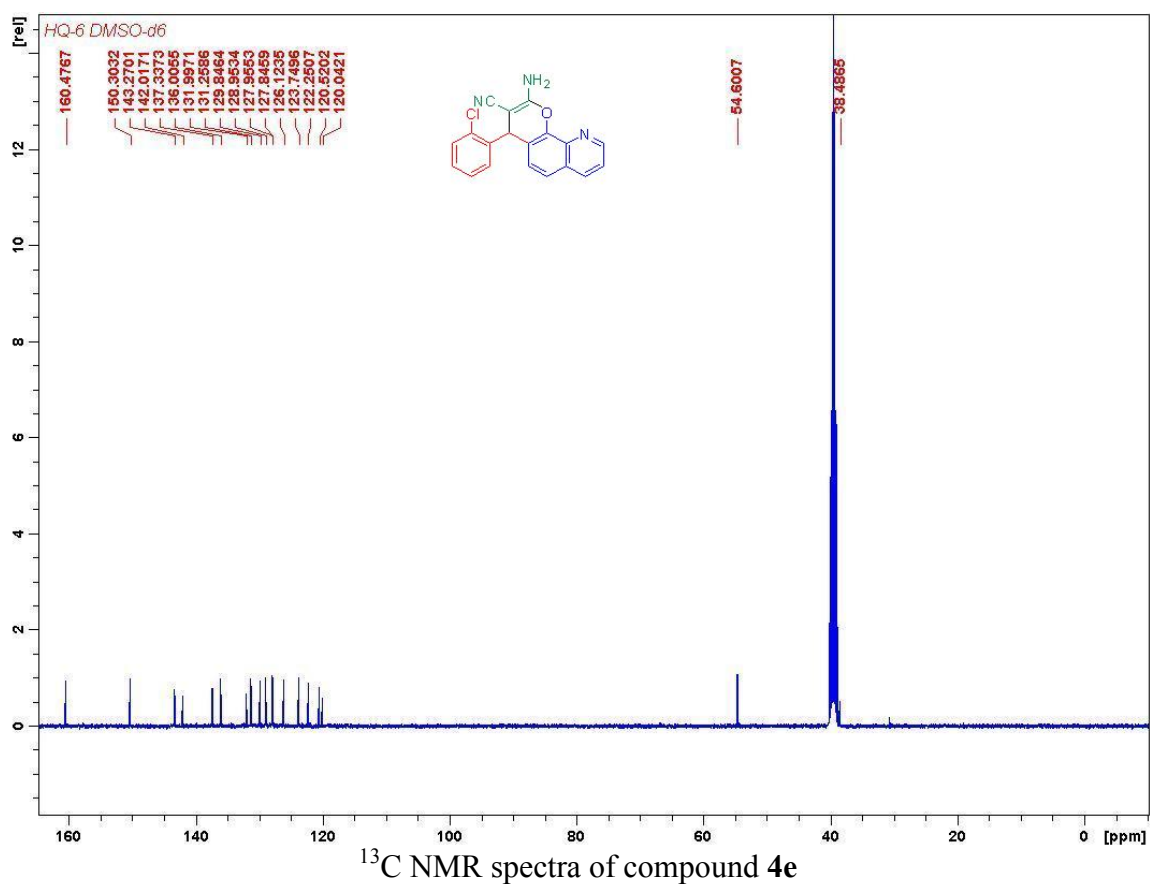

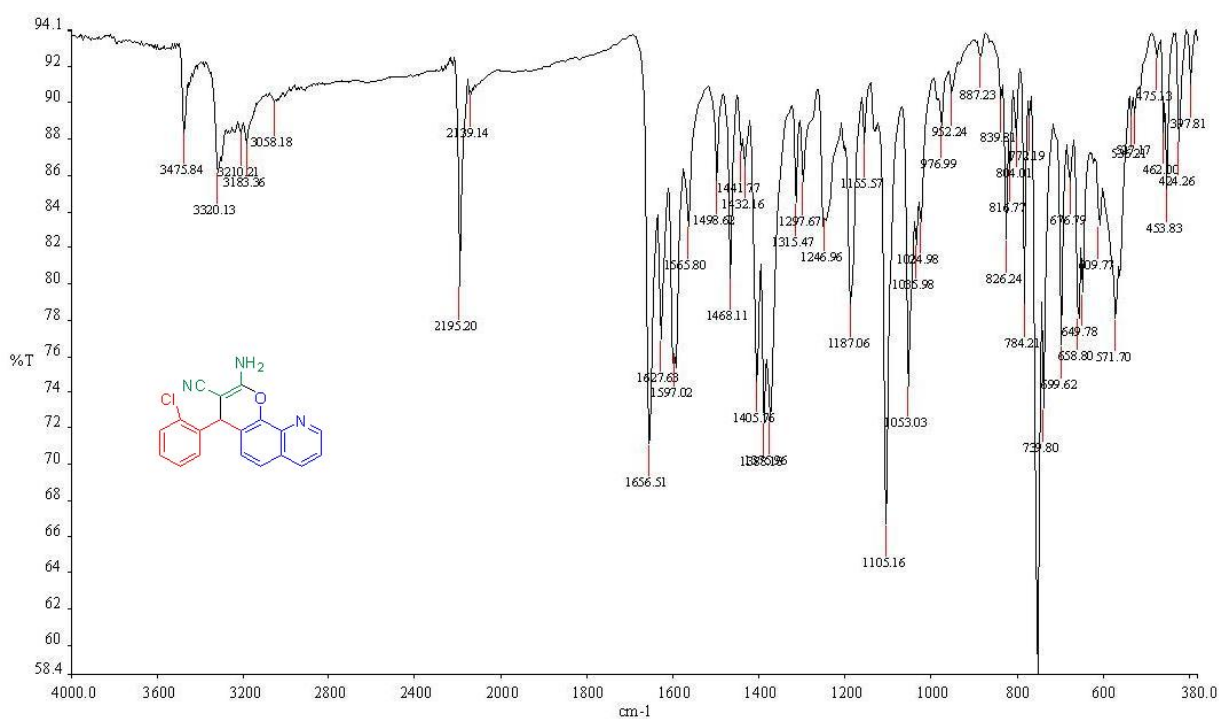

FTIR spectra of compound 4e

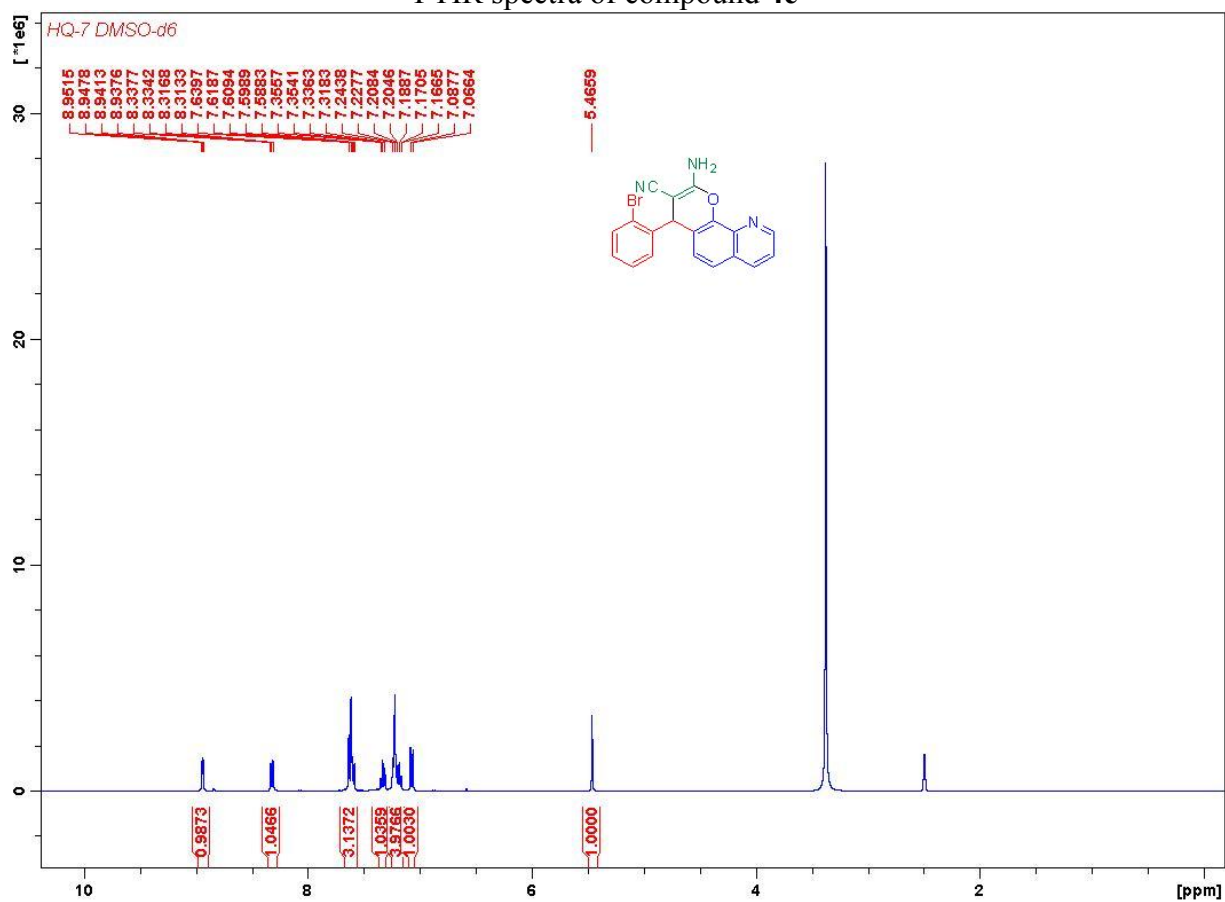

### $^1\text{H}$ NMR spectra of compound **4f**

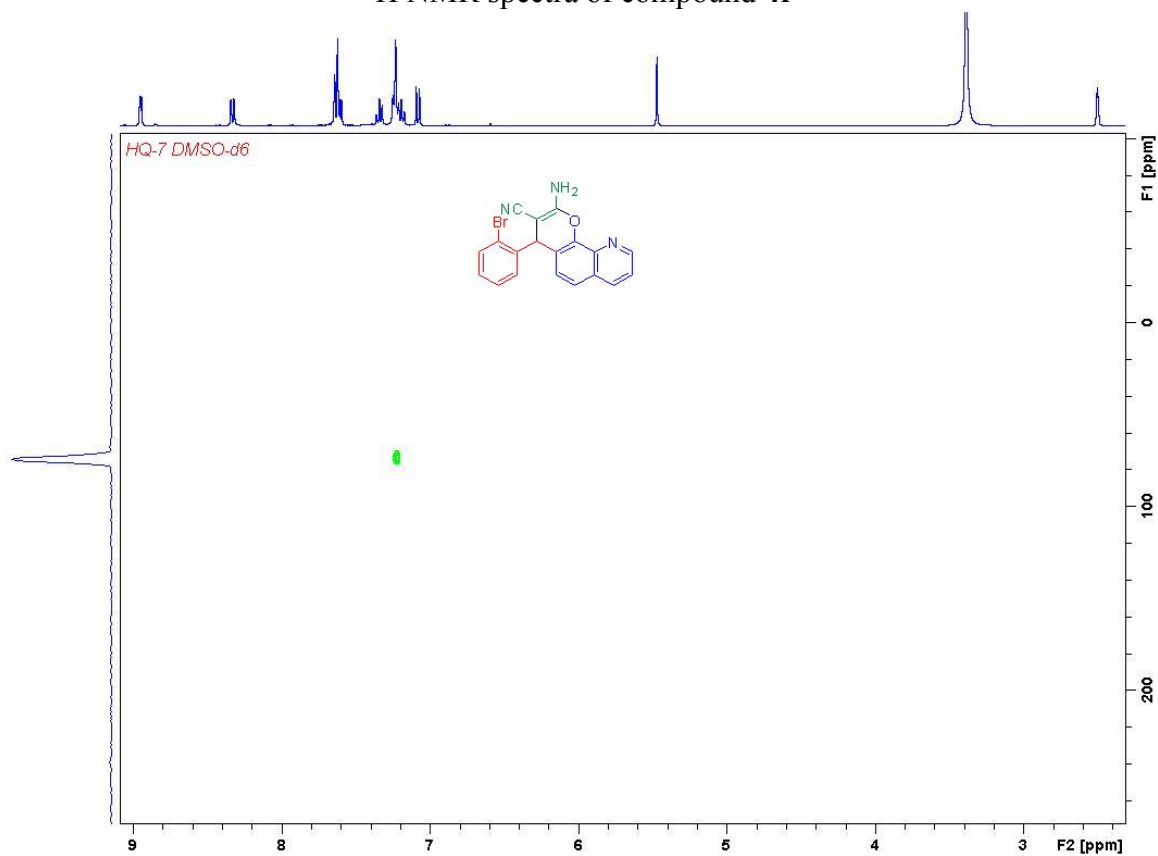

### $^{15}\text{N}$ NMR (ghsqc) spectra of compound **4f**

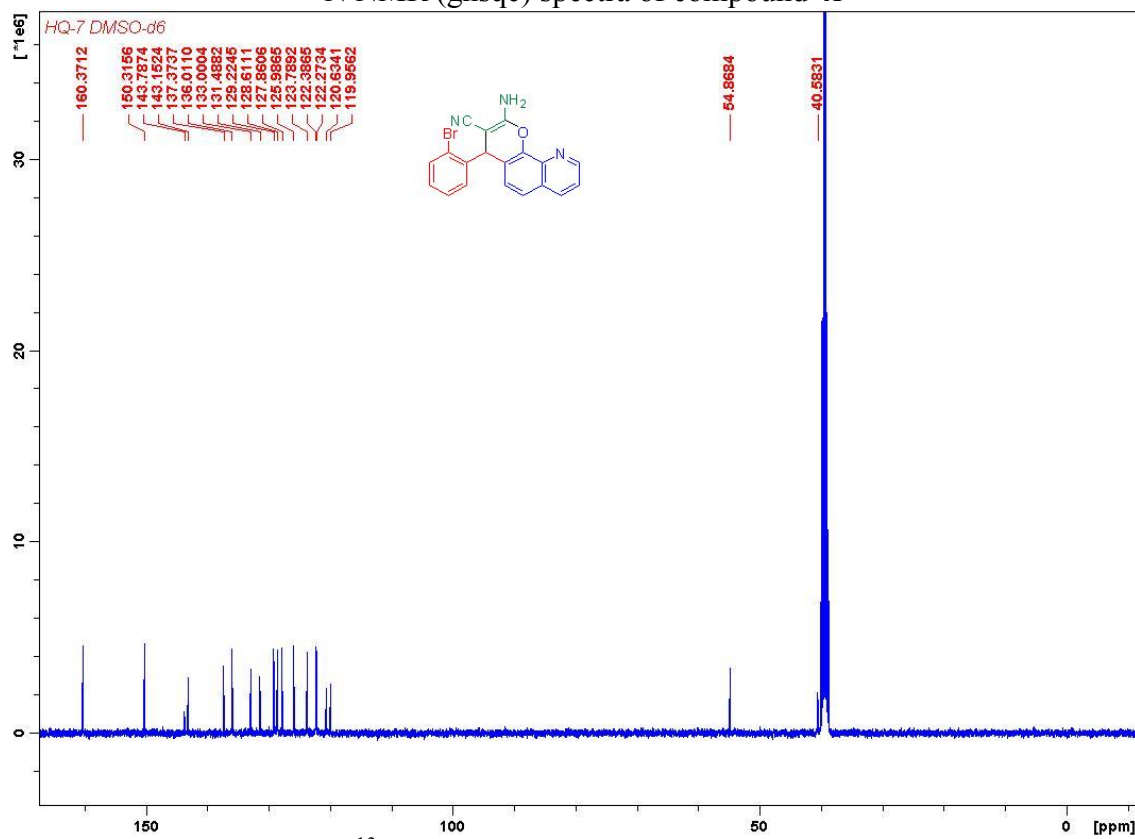

### $^{13}\text{C}$ NMR spectra of compound **4f**

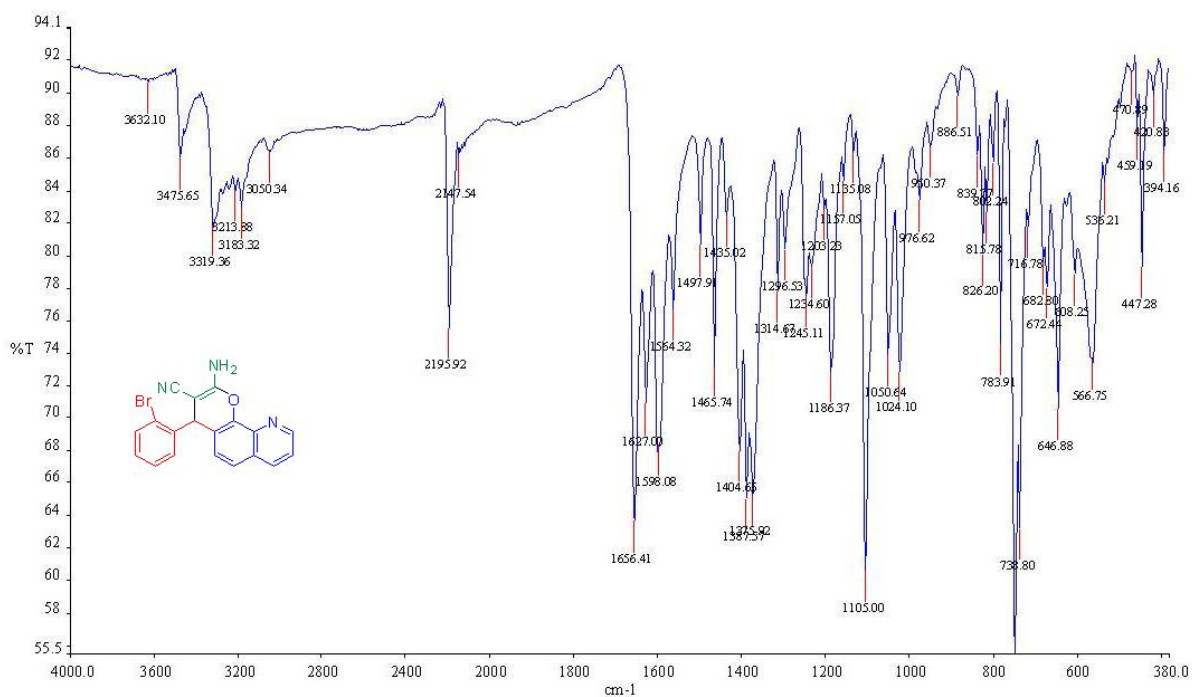

FTIR spectra of compound 4f
